# Supplementary material for: Alternative Splicing in the Anthocyanin Fruit Gene Encoding an R2R3 MYB Transcription Factor Affects Anthocyanin Biosynthesis in Tomato Fruits
Source: PubMed Central journal article supplement — Plant Commun. 2019 Oct 31;1(1):100006. doi: 10.1016/j.xplc.2019.100006 (PMC7747991; doi:10.1016/j.xplc.2019.100006), 2019-10-31
Supplement: mmc1.pdf [file mmc1.pdf]

**Alternative Splicing in the *Anthocyanin fruit* Gene Encoding an R2R3 MYB  
Transcription Factor Affects Anthocyanin Biosynthesis in Tomato Fruits**

**Sara Colanero, Andrea Tagliani, Pierdomenico Perata and Silvia Gonzali**

**SUPPLEMENTAL INFORMATION**

**Supplemental Table 1. List of oligonucleotide primers used for gene cloning**

| <b>Gene Name</b>                            | <b>Forward primer</b>        | <b>Reverse primer</b>             |
|---------------------------------------------|------------------------------|-----------------------------------|
| <i>SIAN2</i> ( <i>Solyc10g086250</i> )      | CACCATGAATACTCCTATGTGTGC     | TTAATTAAGTAGATTCCATAAGTCAATATC    |
| <i>SIANT1</i> ( <i>Solyc10g086260</i> )     | CACCATGAACAGTACATCTATGTC     | TTAATCAAGTAGATTCCATAAGTCAA        |
| <i>SIANT1like</i> ( <i>Solyc10g086270</i> ) | CACCATGAACAGTACATCTATGTCTTCT | TTAATTAAGTAAATCCCATATATCAATATCAAC |
| <i>SIAN2like</i> ( <i>Solyc10g086290</i> )  | CACCATGAATATTGCCAAGACA       | CTAATTAATAGATTCCATAGGTCAATATC     |
| <i>SIAN1</i> ( <i>Solyc09g065100</i> )      | CACCATGGAGATTATACAGCCTAATAG  | TTAATTAACTCTAGGGATTATCTGATTATTG   |
| <i>SIAN11</i> ( <i>Solyc03g097340</i> )     | CACCATGGAGAATTCAAGTCAAGAATC  | TTATACTTTAAGCAGCTGCAACTTGTTAG     |
| <i>SIJAF13</i> ( <i>Solyc08g081140</i> )    | CACCATGGCTATGGGACACCAAGATC   | TCAAGATTTCCATACTACTCTCTGAAGTG     |
| <i>SIAN2like</i> <sup>WT</sup> promoter     | CACCGCTACTTCTATAATGATCAAATTA | GATATGTTAAGTCACAAATACTGCAAA       |
| <i>SIAN2like</i> <sup>Alt</sup> promoter    | CACCAAAATCACTATTTTCGCC       | GATATGTTAAGTCACAAATACTGCAAA       |

**Supplemental Table 2. List of oligonucleotide primers used for quantitative RT-PCR analysis**

| <b>Gene Name</b>                                          | <b>Forward primer</b>        | <b>Reverse primer</b>    |
|-----------------------------------------------------------|------------------------------|--------------------------|
| <i>SIAN2</i> ( <i>Solyc10g086250</i> )                    | TTCCAGGAAGGACAGCAAAC         | AACGAGGACGAGAATGAGGA     |
| <i>SIANT1</i> ( <i>Solyc10g086260</i> )                   | ATAAGTCATGAAAATTGGGGTGAAT    | AGATTCCATAAGTCAATTCAGCAG |
| <i>SIANT1like<sup>wt</sup></i> ( <i>Solyc10g086270</i> )  | GAGGAGGTGTAAGTACTGATTATGGAAA | TCATCCCAACCATCACTTTG     |
| <i>SIANT1like<sup>alt</sup></i> ( <i>Solyc10g086270</i> ) | GAGGAGGTGTAAGTACTAATTATGAAAA | TCATCCCAACCATCACTTTG     |
| <i>SIAN2like</i> ( <i>Solyc10g086290</i> )                | ATATTGCCAAGACATTGGGAGTG      | CCATACTTGTCAATACATTTCTCA |
| <i>SIAN1</i> ( <i>Solyc09g065100</i> )                    | CTAAGAGTGCCCCGCATACAGAC      | ATCCGAAGTGGAGTGCTCAGATA  |
| <i>SIJAF13</i> ( <i>Solyc08g081140</i> )                  | TCAGGGGATCACTACCGAAC         | TCCCATCAAGGTTGGAAGAC     |
| <i>SIAN11</i> ( <i>Solyc03g097340</i> )                   | ATGAAGTGGAGCCGAGAAGA         | TCCATCAGCAGAAACAGA       |
| <i>SIMYB-ATV</i> ( <i>Solyc07g052490</i> )                | GATTGGAATAGATCAAGCACATCA     | TTCGTTGGTAGTCTCTAATGCAAC |
| <i>SIDFR</i> ( <i>Solyc02g085020</i> ) <sup>**</sup>      | TCCGAAGACGACAACGGTTT         | TGACAAGCCAAGAGCCGATAA    |
| <i>SIANS</i> ( <i>Solyc08g080040</i> ) <sup>**</sup>      | GAAGTAGCACTTGGCGTCGAA        | TTGCAAGCCAGGCACCATA      |
| <i>SIEF1a</i> ( <i>Solyc06g005060</i> )                   | GCTGCTGTAACAAGATGGATGC       | GGGGATTTTGTGAGGTTGTAA    |
| <i>SIASR1</i> ( <i>Solyc04g071610</i> )                   | CCTGTTCCACCACAAGGACAA        | GTGCCAAGTTTACCGATTTC     |

\*from Qiu et al. (2016)

\*\*from Bovy et al. (2002)

**A**

```

SLANT1      MNSTMSSSLGVRKGSWTEDEDFLLRKCIDKYEGEKWHLVPIRAGLNCRCKSCRLRWLNLYL
SLANT1like  MNSTMSSSLGVRKGSWTEDEDFLLRKCIDKYEGEKWHLVPIRAGLNCRCKSCRLRWLNLYL
SLAN2       MNTPMCASLGVRKGSWTEQEDSLLRKCIDKYEGEKWHLVPPARAGLNCRCKSCRLRWLNLYL
SLAN2like   --MNIAKTLGVRKGSWTEDEDFLLRKCIDKYEGEKWHLVPPARAGLNCRCKSCRLRWLNLYL
              :*****:* * * * :*****:
              :*****:* * * * :*****:

          R2
SLANT1      RPHIKRGDFQDEVDLILRLHLKLGNRWSLIAGRLPGRTANDVKNYWNTHLHKLLITPK-
SLANT1like  RPHIKRGDFASDEIDLILRLHLKLGNRWSLIAGRLPGRTANDVKNYWNTHLHKLLITPK-
SLAN2       RPHIKRGDFAPDEVDLILRLHLKLGNRWSLIAGRLPGRTANDVKNYWNTHFHKLLSI IAP
SLAN2like   RPHIKRGDFASDEIDLILRLHLKLGNRWSLIAGRLPGRTANDVKNYWNTHLHKLLITP-
              ***** * :*****:
              ***** * :*****:

          R3
SLANT1      -----IVPREKTNNKCGEISTKIEI IKPQPKYFSSTMKN-----ITNNIVILD
SLANT1like  -----IVPREKFKSKRGEISTKIEI IKPQARKFISNTEKN-----VTNNIVIVD
SLAN2       HLHPHPRPRSHPLRLQIKHKS IAVTKNEI IRPQPRNFSNVKKNDSHWCNKSMTINTSDKD
SLAN2like   -----OIOENKYNKTLKI ITESTILRPRPRPRPTFSSENNISWCTNNSMITNLDKD
              . . . . :*:* . . . . :* *

SLANT1      EEHCKEIKS-----EKQTPDASMDNVQWWINLLENCNDDEEED-----VINYE
SLANT1like  KEEECREIIS-----EKQTRDASIDNGDEWWANLLENCNDVVEEEEGAGGVNTNYE
SLAN2       DKRCN-EIVVNICKEKPIGENTSS--IDDGVEWWTNLENCNDEIEEETAN-----VINF
SLAN2like   DEQRNKEI AVNICEKPTRETPSSIDDGVKWWTNLENCNDEVEEEEGGGGVDTYDK
              . . . * . . . * : * * * * . . . *

SLANT1      KTLTSLHHEKSPPLNIGEGNSMQQGISHENWGEFSLNLQPMQGGVQNDDFS A EIDLWN
SLANT1like  KTLTSLHHEITPPLNGGG-----NFMQQGSDGWDFFVVDIDLWN
SLAN2       KTFPTMLLHEIISPPLINDED-----NSMQGPTNWNDDFSVDIDLWN
SLAN2like   ---FEENKLLPNLCEE-----HNSTTMQHGENDDFSVDIDLWN
              : . : * . . . . : . . . . * * * . : * * * :

SLANT1      LLD
SLANT1like  LLN
SLAN2       LLN
SLAN2like   LPN
              *::

```

**B**

```

SLAN2       MNTPMCASLGVRKGSWTEQEDSLLRDCIDKYEGEKWHLVPPARAGLNCRCKSCRLRWLNLYL
SLAN2like   --MNIAKTLGVRKGSWTEDEDFLLRKCIDKYEGEKWHLVPPARAGLNCRCKSCRLRWLNLYL
SLANT1      MNSTMSSSLGVRKGSWTEDEDFLLRKCIDKYEGEKWHLVPIRAGLNCRCKSCRLRWLNLYL
SLANT1like  MNSTMSSSLGVRKGSWTEQEDSLLRKCIDKYEGEKWHLVPIRAGLNCRCKSCRLRWLNLYL
              :*****:* * * * :*****:
              :*****:* * * * :*****:

          R2
SLAN2       RPHIKRGDFAPDEVDLILRLHLKLGNRWSLIAGRLPGRTANDVKNYWNTHFHKLLSI IAP
SLAN2like  RPHIKRGDFALDEIDLILRLHLKLGNRWSLIAGRLPGRTANDVKNYWNTHLHKLLITPK-
SLANT1      RPHIKRGDFQDEVDLILRLHLKLGNRWSLIAGRLPGRTANDVKNYWNTHLHKLLITPK-
SLANT1like  RPHIKRGDFASDEIDLILRLHLKLGNRWSLIAGRLPGRTANDVKNYWNTHLHKLLITPK-
              ***** * :*****:
              ***** * :*****:

          R3
SLAN2       HLHPHPRPRSHPLRLQIKHKS IAVTKNEI IRPQPRNFSNVKKNDSHWCNKSMTINTLDKD
SLAN2like  QIQEN--KYNNTLKI ITESTILRPRPRPGPRTFS--SENNISWCTNNSMITINTLDKD
SLANT1      VPRESK-----INNKCGEISTKIEI IKPQPKYFSSTMKN-----VTNNIVILD
SLANT1like  VPRESK-----FKSKRGEISTKIEI IKPQARKFISNTEKN-----ITNNIVIVD
              : . . . . : * * . . . . : . . . . : * *

SLAN2       DKRCN-EIVVNICKEKPIGENTSS--IDDGVEWWTNLENCNDEIEEETAN-----TNFGK
SLAN2like  DEQHNKEI AVNICEKPTKTPSSIDDGVEWWTNLENCNDEVEEEEGAGGVNTNYE
SLANT1      EEHCKEIKS-----EKQTPDASMDNVQWWINLLENCNDDEEED-----VINYE
SLANT1like  KEEECREIIS-----EKQTRDASIDNGDEWWANLLENCNDVVEEEEGAGGVNTNYE
SLAN2       DKRCN-EIVVNICKEKPIGENTSS--IDDGVEWWTNLENCNDEIEEETAN-----VINF
SLAN2like   DEQRNKEI AVNICEKPTRETPSSIDDGVKWWTNLENCNDEVEEEEGGGGVDTYDK
              . . . * . . . * : * * * * . . . *

SLAN2       TPTMLLHEIISPPLVNGED-----NSMQGPTNWNDDFSVDIDLWN
SLAN2like  ---FEENKLLPNLLEE-----HNSTTMQHGENDDFSVDIDLWN
SLANT1      TLTSLHHEIISPPLNIGEGNSMQQGISHENWGEFSLNLQPMQGGVQNDDFS A EIDLWN
SLANT1like  TITSLHHEITPPLNGGG-----NIMQQESDQWDFFVVDIDLWN
              : . : * . . . . : . . . . * * * . : * * * :

SLAN2       LN
SLAN2like   FN
SLANT1      LD
SLANT1like  LN
              ::

```

**Supplemental Figure 1. Comparative analysis of the WT and the *Aft* sequences of the four R2R3 MYB proteins under study.**

(A) ClustalW alignment of WT R2R3 MYB proteins codified from the four genes located in the distal part of the long arm of chromosome 10. (B) ClustalW alignment of *Aft* R2R3 MYB proteins codified from the four genes located in the distal part of the long arm of chromosome 10. R2 and R3 MYB domains are underlined. Symbols are as follows: “\*” indicates perfect alignment; “:” indicates a site belonging to group exhibiting strong similarity; and “.” indicates a site belonging to a group exhibiting weak similarity.

**A**

```

SIAN2_WT      MNTPMCASLGVKRGSWTEQEDSLLRDCIQKYGEGKWHLVPARAGLNRCRKSCLRWLNLYL
SIAN2_Aft    MNTPMCASLGVKRGSWTEQEDSLLRNCIQKYGEGKWHLVPARAGLNRCRKSCLRWLNLYL
*****
                R2
SIAN2_WT      RPHIKRGDFAPDEVLDLILRLHKLKLNRSWLIAGRLPGRTEANDVKNYWNTHFHKKLSIIAP
SIAN2_Aft    RPHIKRGDFAPDEVLDLILRLHKLKLNRSWLIAGRLPGRTEANDVKNYWNTHFHKKLSIIAP
*****
                R3
SIAN2_WT      HLHPHPRPRSHPRLQIKHKSIAVTKNEIIRPQPRNF#SNVKKNDSHWCNNKSMITNTLDKD
SIAN2_Aft    HLHPHPRPRSHPRLQIKHKSIAVTKNEIIRPQPRNF#SNVKKNDSHWCNNKSMITNTSDKD
*****

SIAN2_WT      DKRCNEIVVNICEKPIGENTSSIDGVEWWTNLENCIEIEEETANTNFGKTPTMLLHEE
SIAN2_Aft    DKRCNEIVVNICEKPIGENTSSIDGVEWWTNLENCIEIEEETANTNFGKTPTMLLHEE
*****

SIAN2_WT      ISPPLVNGEDNSMQQGPPTNNWDDFSTDIDLWNLLN
SIAN2_Aft    ISPPLINDEEDNSMQQGPPTNNWDDFSTDIDLWNLLN
*****

```

**B**

```

SIANT1_WT     MNSTMSLGVKRGSWTDEEDFLLRKCIDKYGEGKWHLVPPIRAGLNRCRKSCLRWLNLYL
SIANT1_Aft   MNSTMSLGVKRGSWTDEEDFLLRKCIDKYGEGKWHLVPPIRAGLNRCRKSCLRWLNLYL
*****
                R2
SIANT1_WT     RPHIKRGDFEQDEVLDLILRLHKLKLNRSWLIAGRLPGRTEANDVKNYWNTNLLRKLNTTKI
SIANT1_Aft   RPHIKRGDFEQDEVLDLILRLHKLKLNRSWLIAGRLPGRTEANDVKNYWNTNLLRKLNTTKI
*****
                R3
SIANT1_WT     VPREKINNKCGEISTKIEIIRKQPRKY#SSTMKNVTNNVILDEEHCKEIISEKQTPDA
SIANT1_Aft   VPREKTNKCGEISTKIEIIRKQPRKY#SSTMKNVTNNVILDEEHCKEIISEKQTPDA
*****

SIANT1_WT     SMDNVDPWWINLLENCNDDIEEDEVVINYEKTLSLLHHEEISPPPLNIGEGNSMQQGQIS
SIANT1_Aft   SMDNVQVWINLLENCNDDIEEDEVVINYEKTLSLLHHEEKSPPLNIGEGNSMQQGQIS
*****

SIANT1_WT     HENWGEFSLNLPMPQQGVQNDDFSAEIDLWNLLD
SIANT1_Aft   HENWGEFSLNLQPMQQGVQNDDFSAEIDLWNLLD
*****

```

**C**

```

SIANT1like_WT MNSTMSLGVKRGSWTEQEDLLLRKCIDKYGEGKWHLVPPIRAGLNRCRKSCLRWLNLYL
SIANT1like_Aft MNSTMSLGVKRGSWTEEDFLLRKCIDKYGEGKWHLVPPIRAGLNRCRKSCLRWLNLYL
*****
                R2
SIANT1like_WT RPHIKRGDFASDEIDLILRLHKLKLNRSWLIAGRLPGRTEANDVKNYWNTNLLRKNVITKI
SIANT1like_Aft RPHIKRGDFASDEIDLILRLHKLKLNRSWLIAGRLPGRTEANDVKNYWNTNLLRKNVITKI
*****
                R3
SIANT1like_WT VPREFKSKRGEISTKIEIIRKQARKFISNTEKNITNNVIVDKKEEKEIISEKQTRDA
SIANT1like_Aft VPREFKSKRGEISTKIEIIRKQARKFISNTEKNVTNNVIVDKKEEEREIISEKQTRDA
*****

SIANT1like_WT SIDNGDEWWANLLENCNDDVVEEEE-GGGGVTDYKGTITSLLHHEITPPLNGGGNIMQQ
SIANT1like_Aft SIDNGDEWWANLLENCNDDVVEEEEAGGGVTDYKGTITSLLHHEITPPLNGGGNFMQQ
*****

SIANT1like_WT EQSDGWDDFFVDIDIWDLN
SIANT1like_Aft GQSDGWDDFFVDIDIWDLN
*****

```

**D**

```

SIAN2like_WT  MNIAKTLGVKRGSWTEDEDILLRKCIDKYGEGKWHLVPFRAGLNRCRKSCLRWLNLYL
SIAN2like_Aft MNIAKTLGVKRGSWTEDEDILLRKCIDKYGEGKWHLVPFRAGLNRCRKSCLRWLNLYL
*****
                R2
SIAN2like_WT  HIKRGDFALDEIDLILRLHKLKLNRSWLIAGRLPGRTEANDVKNYWNTLHKKLLITPQI
SIAN2like_Aft HIKRGDFALDEIDLILRLHKLKLNRSWLIAGRLPGRTEANDVKNYWNTLHKKLLITP-QI
*****
                R3
SIAN2like_WT  QENKYNLTKIITESTILRPRRPGQPRTF#SENNISWCTNNSMITNTLDKDEQHNKE
SIAN2like_Aft QENKYNLTKIITESTILRPRRPP--RPRTF#SENNISWCTNNSMITNTLDKDEQRNKE
*****

SIAN2like_WT  IAVNICEKPTKKTSSSIDDGVQWWTNLENWKEFEEEAVALNFEENKLLPNLLYEE
SIAN2like_Aft IAVNICEKPTRETPSSSIDDGVQWWTNLENWKEFEEEAVALNFEENKLLPNLLCEE
*****

SIAN2like_WT  HNSTTMQHGENDDFSVDIDLWNLFN
SIAN2like_Aft HNSTTMQHGENDDFSVDIDLWNLFN
*****

```

**Supplemental Figure 2. Comparative analysis of the sequences of the R2R3 MYB proteins encoded by the WT and the *Aft* alleles of each gene. (A) ClustalW alignments of WT and *Aft* SIAN2 proteins. (B) ClustalW alignments of WT and *Aft* SIANT1 proteins. (C) ClustalW alignments of WT and *Aft* SIANT1like proteins. (D) ClustalW alignments of WT and *Aft***

SIAN2like proteins. R2 and R3 MYB domains are underlined. In each alignment the [DE]Lx2[RK]x3Lx6Lx3R motif containing the bHLH-binding site (Zimmermann et al., 2004) is boxed in grey, the aminoacidic signature [A/S/G]NDV typical of dicot R2R3 MYBs promoting anthocyanin (Lin-Wang et al., 2010; Heppel et al., 2013) is boxed in light purple and the KPRPR[ST]F motif, conserved in Arabidopsis MYBs involved in anthocyanin synthesis (Stracke et al., 2001), is boxed in green. Symbols are as follows: “\*” indicates perfect alignment; “:” indicates a site belonging to group exhibiting strong similarity; and “.” indicates a site belonging to a group exhibiting weak similarity.



|                              |                                                                          |     |
|------------------------------|--------------------------------------------------------------------------|-----|
| promSIAN2like <sup>WT</sup>  | AAAATCAATATTTCGCCCATGAAATGCAACTGAACCTGTATTGAAAT.....AACTCT               | 54  |
| promSIAN2like <sup>Aft</sup> | AAAATCAATATTTCGCCCATGAAATGCAACTGAACCTGTATTGAAATCTGAAAAACATCTAATAACTCT    | 70  |
| promScAN2like                | AAAATCAATATTTCGCCCATGAAATGCAACTGAACCTGTATTGAAATCTGAAAAACATCTAATAACTCT    | 70  |
| consensus                    | aaaatca tatttcgcccat aaa gcaactgaactgtatt gaaat aactct                   |     |
| promSIAN2like <sup>WT</sup>  | TCCTTTTCCTTTTTATTTTTATCTTCTTTTTCAGAAAACCTTTTTTCCATTCAAATATATTTAATG       | 124 |
| promSIAN2like <sup>Aft</sup> | TCCTTTTCCTTTTTATTTTTATCTTCTTTTTCAGAAAACCTTTTTTCCATTCAAATATATTTAATG       | 140 |
| promScAN2like                | TCCTTTTCCTTTTTATTTTTATCTTCTTTTTCAGAAAACCTTTTTTCCATTCAAATATATTTAATG       | 140 |
| consensus                    | tctttttcctTTTTATTTTTATCTTCTTTTTCAGAAAACCTTTTTTCCATTCAAATATATTTAATG       |     |
|                              | <b>Myb binding site</b>                                                  |     |
| promSIAN2like <sup>WT</sup>  | TTTAAATATGCTTCAGCATAAGAAAAAGTATATTCAAACAGTTAAACATAAATTTGTTAAATATAATCA    | 194 |
| promSIAN2like <sup>Aft</sup> | TTTAAATATGCTTCAGCATAAGAAAAAGTATATTCAAACAGTTAAACATAAATTTGTTAAATATAATCA    | 210 |
| promScAN2like                | TTTAAATATGCTTCAGCATAAGAAAAAGTATATTCAAACAGTTAAACATAAATTTGTTAAATATAATCA    | 210 |
| consensus                    | tttaaataatgcttcagcataagaaaaagtataatcaaacagttaaacataaatttgtttaaataataatca |     |
| promSIAN2like <sup>WT</sup>  | TCGCCACTCCCGTCTCAACTTCAATTTTTTGAATTTTAAAAAAAATAAATAACATATAATAGCCC        | 263 |
| promSIAN2like <sup>Aft</sup> | TCGCCACTCCCGTCTCAACTTCAATTTTTTGAATTTTAAAAAAAATAAATAACATATAATAGCCC        | 280 |
| promScAN2like                | TCGCCACTCCCGTCTCAACTTCAATTTTTTGAATTTTAAAAAAAATAAATAACATATAATAGCCC        | 279 |
| consensus                    | tcgccac ctccgtcttcaacttcaatTTTTTGAATTTTAAAAAAAATAAATAACATATAATAGCCC      |     |
| promSIAN2like <sup>WT</sup>  | ATATCTATGATCTAAATTTATGACATTATATTTAATTTTGCAAAATCAGAGGAACCATATGAAA         | 333 |
| promSIAN2like <sup>Aft</sup> | ATATCTATGATCTAAATTTATGACATTATATTTAATTTTGCAAAATCAGAGGAACCATATGAAA         | 349 |
| promScAN2like                | ATATCTATGATCTAAATTTATGACATTATATTTAATTTTGCAAAATCAGAGGAACCATATGAAA         | 348 |
| consensus                    | atatctatgatctaa tttatgacattatattttaatttttgcAAAATCAGAGGAACCATATGAAA       |     |
|                              | <b>GATA</b>                                                              |     |
| promSIAN2like <sup>WT</sup>  | CATTACGGCACATTTGGTTGATTACAATCCATCCAGTCCCTTCTATACTTTACTATTGTTCTTAATATC    | 403 |
| promSIAN2like <sup>Aft</sup> | CATTACGGCACATTTGGTTGATTACAATCCATCCAGTCCCTTCTATACTTTACTATTGTTCTTAATATC    | 419 |
| promScAN2like                | CATTACGGCACATTTGGTTGATTACAATCCATCCAGTCCCTTCTATACTTTACTATTGTTCTTAATATC    | 418 |
| consensus                    | cattacggcacatTTGGTTGATTACAATCCATCCAGTCCCTTCTATACTTTACTATTGTTCTTAATATC    |     |
|                              | <b>bHLH binding site</b>                                                 |     |
| promSIAN2like <sup>WT</sup>  | TATATAGATCGATAGATTTTCACTCATTTTGTATAACAATTTGTGGAAGAGCAAAGAAAAAAAACC       | 473 |
| promSIAN2like <sup>Aft</sup> | TATATAGATCGATAGATTTTCACTCATTTTGTATAACAATTTGTGGAAGAGCAAAGAAAAAAAACC       | 489 |
| promScAN2like                | TATATAGATCGATAGATTTTCACTCATTTTGTATAACAATTTGTGGAAGAGCAAAGAAAAAAAACC       | 488 |
| consensus                    | tatatagatcgatagatTTTCACTCATTTTGTATAACAATTTGTGGAAGAGCAAAGAAAAAAAACC       |     |
|                              | <b>GATA Myb/SANT HD-ZIP</b>                                              |     |
| promSIAN2like <sup>WT</sup>  | ACCACCAAAGTACAAAAGGGTTTCTAAAAGGTCCTTTTTCTATATAGTTGTTGTTTTAGTATATTTCGT    | 543 |
| promSIAN2like <sup>Aft</sup> | ACCACCAAAGTACAAAAGGGTTTCTAAAAGGTCCTTTTTCTATATAGTTGTTGTTTTAGTATATTTCGT    | 559 |
| promScAN2like                | ACCACCAAAGTACAAAAGGGTTTCTAAAAGGTCCTTTTTCTATATAGTTGTTGTTTTAGTATATTTCGT    | 558 |
| consensus                    | accaccaaagtacaaaagggTTTTCTAAAAGGTCCTTTTTCTATATAGTTGTTGTTTTAGTATATTTCGT   |     |
| promSIAN2like <sup>WT</sup>  | TATCATCCCCTTGTTTAACTTTACTTTCTTCCCTCTTTTATTCATTTTAAAAATTCACCTCACAATAT     | 613 |
| promSIAN2like <sup>Aft</sup> | TATCATCCCCTTGTTTAACTTTACTTTCTTCCCTCTTTTATTCATTTTAAAAATTCACCTCACAATAT     | 629 |
| promScAN2like                | TATCATCCCCTTGTTTAACTTTACTTTCTTCCCTCTTTTATTCATTTTAAAAATTCACCTCACAATAT     | 627 |
| consensus                    | tatcatccccttgTTTAACTTTACTTTCTTCCCTCTTTTATTCATTTTAAAAATTCACCTCACAATAT     |     |
|                              | <b>Myb binding site</b>                                                  |     |
| promSIAN2like <sup>WT</sup>  | TAAATCATA.....GTTTAAATATGTAAAGATTATAAAATTTGAAGTGTTTGAATT                 | 664 |
| promSIAN2like <sup>Aft</sup> | TAAATCATA.....GTTTAAATATGTAAAGATTATAAAATTTGAAGTGTTTGAATT                 | 674 |
| promScAN2like                | TAAATCATA.....GTTTAAATATGTAAAGATTATAAAATTTGAAGTGTTTGAATT                 | 697 |
| consensus                    | ta tca tt a t gattataaaatTTGAAGTGTTTGAATT                                |     |
| promSIAN2like <sup>WT</sup>  | TAGGGGTAGAGTATTAGCATGTATACATGTTGATTGAATTCAAATACATTTATATAAATAATATATGT     | 734 |
| promSIAN2like <sup>Aft</sup> | TAGGGGTAGAGTATTAGCATGTATACATGTTGATTGAATTCAAATACATTTATATAAATAATATATGT     | 744 |
| promScAN2like                | TAGGGGTAGAGTATTAGCATGTATACATGTTGATTGAATTCAAATACATTTATATAAATAATATATGT     | 767 |
| consensus                    | taggggtagagTATTAGCATGTATACATGTTGATTGAATTCAAATACATTTATATAAATAATATATGT     |     |
|                              | <b>Myb related</b>                                                       |     |
| promSIAN2like <sup>WT</sup>  | ATGTTAATAAATTTATTAATATATACAATATTTATTTTACTTAAATCGTTATTGTAGGCCTTA          | 804 |
| promSIAN2like <sup>Aft</sup> | ATGTTAATAAATTTATTAATATATACAATATTTATTTTACTTAAATCGTTATTGTAGGCCTTA          | 814 |
| promScAN2like                | ATGTTAATAAATTTATTAATATATACAATATTTATTTTACTTAAATCGTTATTGTAGGCCTTA          | 837 |
| consensus                    | atgTTAATAAATTTATTAATATATACAATATTTATTTTACTTAAATCGTTATTGTAGGCCTTA          |     |
| promSIAN2like <sup>WT</sup>  | AACTCAATAGTTGCTTTTGGTTTTGGATTTATTTGCAGTATTTGTGACTTAACATATC               | 862 |
| promSIAN2like <sup>Aft</sup> | AACTCAATAGTTGCTTTTGGTTTTGGATTTATTTGCAGTATTTGTGACTTAACATATC               | 871 |
| promScAN2like                | AACTCAATAGTTGCTTTTGGTTTTGGATTTATTTGCAGTATTTGTGACTTAACATATC               | 894 |
| consensus                    | aactcaatagttgctTTTGGTTTTGGATTTATTTGCAGTATTTGTGACTTAACATATC               |     |
|                              | <b>WRKY</b>                                                              |     |

**Supplemental Figure 4.** Alignment of 900 bp of *AN2like* promoter sequences of WT, *Aft* and *S. chilense* plants. WT and *Aft* sequences are from the present work. The sequence of the *S. chilense* promoter is from Stam et al. (2019). Major transcription factors binding sites are shown in red.



**A**

```

Solyc10g086290.1.1 ATGAATATTGCCAAGACATTGGGAGTGAGAAAAGGTTTCATGGACTGAAGATGAAGATATTCTTTTGGAGAAAT
SIAN2like_Aft GTATTGACAAGTATGGAGAAGGAAAGTGGCATCTTGTTCCTTTTAGAGCTGTAAGCGAAATTAAGATTTTA
CTTTTATAAATTTTAAATTTTATGATAATAAATAGTCTCAAAATTTAGTAGATATTAAGTAATAATTTGTTA
ATGCAAAAATAATATTTAGGCAAAATCTATAGATATACATAAATTTCCCTTTTAAAGAAAAGAGAAACCTTAA
CTTTTGGTGTGATAGTGGGCTCCCAACCTATAACTAGCATGAATAGCAATTTTATGCTCCCTTTTATAC
CGAGTCAATAATCAATTTGTTAGGAGTTTACAATTAATATACACATATATTTAGTAAATTTTTTATGCTG
AATATAACACTACCAAAAAAATTTACTGGATTCGTTCAATCCCAAAATCCCACTTACTATTATTCATGTG
AAATATATGCTGCTCAATAGATGTCGAAGAGTTGTAGACTGAGGTGGTGAATATATCAAGGCCATATC
AAGAGAGGCTGCTTGTCTGGATGAATAGATCTCATTTTGGAGCTTCAAGACTTCTAGCAGCTTACGCAATAG
TCAAAAATTTGTTAAAAAATATTTAAAAATTTTGTACATATATATTCACGAAAAGTAATTTTGACATA
TAAATTTACGTACATACTAGTCTCTCGAATATATTTAGTAAGTTATCTTTGATGCCATTTTTTATATTTTT
TTGGTTTGAATGTCACCTTATTGCTGGGAGACTTCCGGAAGAACAGCAACAGATGTGAAAACATTTGGAAAC
ACACACCTACACAGAGTATTATAAATCTCCTCCTCAGATACAAGAGAAATAGTACAATAATACCCCTCAAGA
TTATCACTGAAAGCATACTACGACCACGACCAAGACCAGGACCTCAACCTCGAACCTTCTCAAGTGAAAA
TAATATTTCTTGTGTCATAACAATAGTATGATCACAACACATTTAGCAAAAGATGACGAACACACACAAAA
GAAATCGCAGTAATATTTGTGAGAAGCCAAACAAAAAACACCCGTCATCTATAGACGATGATGGATTC
AAATGTTGACAAATTTACTGGAAAAATTTGGAAGAATTTGAGGAAGAACCAACAGCAGTATGAACCTTGAGGA
AGAAAATAGTTGTGCCAAATTTGTTGATGAGGAACATAATTCACCAACCATGCAACATGGAGAAAATGAT
GACTTTTCAGTTGATATTGACCTATGGAATCTATTTAATTAG

```

**B**

```

ATGAATATTGCCAAGACATTGGGAGTGAGAAAAGGTTTCATGGACTGAAGATGAAGATATTCTTTTGGAGAAAT
GTATTGACAAGTATGGAGAAGGAAAGTGGCATCTTGTTCCTTTTAGAGCTGTAAGCGAAATTAAGATTTTA
ATTTTATGATTTTAAATTTTATGATAATAAATAGTCTCAAAATTTAGTAGATATTAAGTAATAATTTGTTA
TGCAAAAATACTATTAGGCAAAATCTATAGATATACATAAATTTCCCTTTTAAAGAAAAGAGAAACCTTAA
CTTTTGGTGTGATAGTGGGCTCCCAACCTATAACTAGCATGAATAGCAATTTTATGCTCCCTTTTATAC
AGTCTCAATAATTAATTTGTTAGGAGTTTACAATTAATATATATATATTTGATTAATTTTTTATGTTTATA
TACAATATCTATGAAAAAATTTACTAGGTTCTGTTCAACCCCAAAATCCCACTTACTATTATTCACGTTGATTA
TATGCTGCTCAATAGATGTCGAAGAGTTGTAGACTGAGGTGGTGAATATCTAAGGCCACATATCAAGA
GAGGTGACTTTGCTATGGAATAGATCTCATTTTGGAGCTTCAAGACTTCTAGGCAATAGCAAGTCAAGTCA
AAATATGTTTAAAGAAATTTAAAAATTTTGTACATATATTTTACGAAAAGAAATTTTGTACATCAAAAT
TGTGTACATATGCTTCCCGTATATATTTAAGTAGTTGTTCTTGTATGCCATATTTTATTTTCTTTTGGTT
TAGATGTCACCTTATTGCTGGGAGACTTCCGGGAAGAACGCAACAGATGTGAAAAACTATTGGAACACACAC
CTACACAGAGTATTATAAATCTCCTCAGATACAAGAGAAATAGTACAATAAACCCTCAAGATTTACCTG
AAAGCACTATCTACGACCACGACCAAGACTTCCGACTCCGAACTTCAAGTGAATAATATTTCTTGGTG
CACTAACAATAGTATGATCACAACACATTTAGCAAAAGATGACCAACACGCAACAGAAATCGCATTAAT
ATTTGTGAGAAGCCAAACAGAAACACCCGTCATCTGCTATAGACGATGATGGAGTTAAATGGTGGACAAAT
TACTGGAAAAATTTGGAAGAATTTGAGGAAGAAGCAACAGCAGTATGAACCTTTGAGGAAGAAAATTAAGTTGT
ACCAAAATTTGTTGTGAGGAACATAATTCACCAACCATGCAACATGGAGAAAATGATGACTTTTCAGTTGAT
ATTGACCTATGGAATCTATTTAATTAG

```

**Supplemental Figure 5. Alternative splicing of WT *SIAN2like* gene.**

(A) ClustalW alignment of the cds of *SIAN2like*<sup>Att</sup> with the sequence of the cds of *Solyc10g086290.1.1* (SOL Genomics Network). (B) Genomic sequence of *SIAN2like*<sup>Att</sup>, showing the canonical splicing sites, represented in yellow, at the boundaries between exons (in green) and introns. (C) Genomic sequence of *Solyc10g086290.1* (SOL Genomics Network), corresponding to *SIAN2like*<sup>WT</sup>, showing the canonical splicing sites, represented in yellow, at the boundaries between exons (in green) and introns. (D-E) Genomic sequence of *Solyc10g086290.1* (SOL Genomics Network), corresponding to *SIAN2like*<sup>WT</sup>, showing the canonical (represented in yellow), and the alternative (represented in orange) splicing sites at the boundaries between exons (in green) and introns. In (D) and (E) the intro-exon structures of the WT pre-mRNAs of *SIAN2like* inferred from the sequences of the two transcripts cloned in WT fruit peel are shown. The premature stop codons are highlighted in red. Sequence D corresponds to the pre-mRNA of transcript 1. Sequence E corresponds to the pre-mRNA of transcript 2.

**C**

```

ATGAATATTGCCAAGACATTGGGAGTGAGAAAAGGTTTCATGGACTGAAGATGAAGATATTCTTTTGGAGAAAT
GTATTGACAAGTATGGAGAAGGAAAGTGGCATCTTGTTCCTTTTAGAGCTGTAAGCGAAATTAAGATTTTA
CTTTTATAAATTTTAAATTTTATGATAATAAATAGTCTCAAAATTTAGTAGATATTAAGTAATAATTTGTTA
ATGCAAAAATAATATTTAGGCAAAATCTATAGATATACATAAATTTCCCTTTTAAAGAAAAGAGAAACCTTAA
CTTTTGGTGTGATAGTGGGCTCCCAACCTATAACTAGCATGAATAGCAATTTTATGCTCCCTTTTATAC
CGAGTCAATAATCAATTTGTTAGGAGTTTACAATTAATATACACATATATTTAGTAAATTTTTTATGCTG
AATATAACACTACCAAAAAAATTTACTGGATTCGTTCAATCCCAAAATCCCACTTACTATTATTCATGTG
AAATATATGCTGCTCAATAGATGTCGAAGAGTTGTAGACTGAGGTGGTGAATATCTAAGGCCATATC
AAGAGAGGCTGCTTGTCTGGATGAATAGATCTCATTTTGGAGCTTCAAGACTTCTAGCAGCTTACGCAATAG
TCAAAAATTTGTTAAAAAATATTTAAAAATTTTGTACATATATATTCACGAAAAGTAATTTTGACATA
TAAATTTACGTACATACTAGTCTCTCGAATATATTTAGTAAGTTATCTTTGATGCCATTTTTTATATTTTT
TTGGTTTGAATGTCACCTTATTGCTGGGAGACTTCCGGAAGAACAGCAACAGATGTGAAAACATTTGGAAAC
ACACACCTACACAGAGTATTATAAATCTCCTCCTCAGATACAAGAGAAATAGTACAATAATACCCCTCAAGA
TTATCACTGAAAGCATACTACGACCACGACCAAGACCAGGACCTCAACCTCGAACCTTCTCAAGTGAAAA
TAATATTTCTTGTGTCATAACAATAGTATGATCACAACACATTTAGCAAAAGATGACGAACACACACAAAA
GAAATCGCAGTAATATTTGTGAGAAGCCAAACAAAAAACACCCGTCATCTATAGACGATGATGGATTC
AAATGTTGACAAATTTACTGGAAAAATTTGGAAGAATTTGAGGAAGAACCAACAGCAGTATGAACCTTGAGGA
AGAAAATAGTTGTGCCAAATTTGTTGATGAGGAACATAATTCACCAACCATGCAACATGGAGAAAATGAT
GACTTTTCAGTTGATATTGACCTATGGAATCTATTTAATTAG

```

**D**

```

ATGAATATTGCCAAGACATTGGGAGTGAGAAAAGGTTTCATGGACTGAAGATGAAGATATTCTTTTGGAGAAAT
GTATTGACAAGTATGGAGAAGGAAAGTGGCATCTTGTTCCTTTTAGAGCTGTAAGCGAAATTAAGATTTTA
CTTTTATAAATTTTAAATTTTATGATAATAAATAGTCTCAAAATTTAGTAGATATTAAGTAATAATTTGTTA
ATGCAAAAATAATATTTAGGCAAAATCTATAGATATACATAAATTTCCCTTTTAAAGAAAAGAGAAACCTTAA
CTTTTGGTGTGATAGTGGGCTCCCAACCTATAACTAGCATGAATAGCAATTTTATGCTCCCTTTTATAC
CGAGTCAATAATCAATTTGTTAGGAGTTTACAATTAATATACACATATATTTAGTAAATTTTTTATGCTG
AATATAACACTACCAAAAAAATTTACTGGATTCGTTCAATCCCAAAATCCCACTTACTATTATTCATGTG
AAATATATGCTGCTCAATAGATGTCGAAGAGTTGTAGACTGAGGTGGTGAATATCTAAGGCCATATC
AAGAGAGGCTGCTTGTCTGGATGAATAGATCTCATTTTGGAGCTTCAAGACTTCTAGCAGCTTACGCAATAG
TCAAAAATTTGTTAAAAAATATTTAAAAATTTTGTACATATATATTCACGAAAAGTAATTTTGACATA
TAAATTTACGTACATACTAGTCTCTCGAATATATTTAGTAAGTTATCTTTGATGCCATTTTTTATATTTTT
TTGGTTTGAATGTCACCTTATTGCTGGGAGACTTCCGGAAGAACAGCAACAGATGTGAAAACATTTGGAAAC
ACACACCTACACAGAGTATTATAAATCTCCTCCTCAGATACAAGAGAAATAGTACAATAATACCCCTCAAGA
TTATCACTGAAAGCATACTACGACCACGACCAAGACCAGGACCTCAACCTCGAACCTTCTCAAGTGAAAA
TAATATTTCTTGTGTCATAACAATAGTATGATCACAACACATTTAGCAAAAGATGACGAACACACACAAAA
GAAATCGCAGTAATATTTGTGAGAAGCCAAACAAAAAACACCCGTCATCTATAGACGATGATGGATTC
AAATGTTGACAAATTTACTGGAAAAATTTGGAAGAATTTGAGGAAGAACCAACAGCAGTATGAACCTTGAGGA
AGAAAATAGTTGTGCCAAATTTGTTGATGAGGAACATAATTCACCAACCATGCAACATGGAGAAAATGAT
GACTTTTCAGTTGATATTGACCTATGGAATCTATTTAATTAG

```

**E**

```

ATGAATATTGCCAAGACATTGGGAGTGAGAAAAGGTTTCATGGACTGAAGATGAAGATATTCTTTTGGAGAAAT
GTATTGACAAGTATGGAGAAGGAAAGTGGCATCTTGTTCCTTTTAGAGCTGTAAGCGAAATTAAGATTTTA
CTTTTATAAATTTTAAATTTTATGATAATAAATAGTCTCAAAATTTAGTAGATATTAAGTAATAATTTGTTA
ATGCAAAAATAATATTTAGGCAAAATCTATAGATATACATAAATTTCCCTTTTAAAGAAAAGAGAAACCTTAA
CTTTTGGTGTGATAGTGGGCTCCCAACCTATAACTAGCATGAATAGCAATTTTATGCTCCCTTTTATAC
CGAGTCAATAATCAATTTGTTAGGAGTTTACAATTAATATACACATATATTTAGTAAATTTTTTATGCTG
AATATAACACTACCAAAAAAATTTACTGGATTCGTTCAATCCCAAAATCCCACTTACTATTATTCATGTG
AAATATATGCTGCTCAATAGATGTCGAAGAGTTGTAGACTGAGGTGGTGAATATCTAAGGCCATATC
AAGAGAGGCTGCTTGTCTGGATGAATAGATCTCATTTTGGAGCTTCAAGACTTCTAGGCAATAGCAAGTCA
AAATATGTTTAAAGAAATTTAAAAATTTTGTACATATATTTTACGAAAAGAAATTTTGTACATCAAAAT
TGTGTACATATGCTTCCCGTATATATTTAAGTAGTTGTTCTTGTATGCCATATTTTATTTTCTTTTGGTT
TAGATGTCACCTTATTGCTGGGAGACTTCCGGGAAGAACGCAACAGATGTGAAAAACTATTGGAACACACAC
CTACACAGAGTATTATAAATCTCCTCAGATACAAGAGAAATAGTACAATAAACCCTCAAGATTTACCTG
AAAGCACTATCTACGACCACGACCAAGACTTCCGACTCCGAACTTCAAGTGAATAATATTTCTTGGTG
CACTAACAATAGTATGATCACAACACATTTAGCAAAAGATGACCAACACGCAACAGAAATCGCATTAAT
ATTTGTGAGAAGCCAAACAGAAACACCCGTCATCTGCTATAGACGATGATGGAGTTAAATGGTGGACAAAT
TACTGGAAAAATTTGGAAGAATTTGAGGAAGAAGCAACAGCAGTATGAACCTTTGAGGAAGAAAATTAAGTTGT
ACCAAAATTTGTTGTGAGGAACATAATTCACCAACCATGCAACATGGAGAAAATGATGACTTTTCAGTTGAT
ATTGACCTATGGAATCTATTTAATTAG

```

**A**

|                                           |                                                                                   |     |
|-------------------------------------------|-----------------------------------------------------------------------------------|-----|
| <i>Solyc10g086290.1.1</i>                 | ATGAATATTGCCAAGACATGGGAGTGAGAAAAGTTTCATGGACTGAAGATGAAGATATCTTTTGAGGAAATGTATTGA    | 80  |
| Heinz 1706 <i>SIAN2like</i> transcript    | ATGAATATTGCCAAGACATGGGAGTGAGAAAAGTTTCATGGACTGAAGATGAAGATATCTTTTGAGGAAATGTATTGA    | 80  |
| Ailsa Craig <i>SIAN2like</i> transcript1  | ATGAATATTGCCAAGACATGGGAGTGAGAAAAGTTTCATGGACTGAAGATGAAGATATCTTTTGAGGAAATGTATTGA    | 80  |
| Ailsa Craig <i>SIAN2like</i> transcript 2 | ATGAATATTGCCAAGACATGGGAGTGAGAAAAGTTTCATGGACTGAAGATGAAGATATCTTTTGAGGAAATGTATTGA    | 80  |
| consensus                                 | atgaatattgccaaagacattgggagtgagaaaagtttcattggactgaagatgaagatattcttttgaggaatgtattga |     |
| <i>Solyc10g086290.1.1</i>                 | CAAGTATGGAGAAGCAAGTGGCATCTTGTTCCTTTTAGAGCTGGTCTAAATAGATGTCGAAAGAGTTGTAGACTGAGGT   | 160 |
| Heinz 1706 <i>SIAN2like</i> transcript    | CAAGTATGGAGAAGCAAGTGGCATCTTGTTCCTTTTAGAGCTGGTCTAAATAGATGTCGAAAGAGTTGTAGACTGAGGT   | 160 |
| Ailsa Craig <i>SIAN2like</i> transcript1  | CAAGTATGGAGAAGCAAGTGGCATCTTGTTCCTTTTAGAGCTGGTCTAAATAGATGTCGAAAGAGTTGTAGACTGAGGT   | 160 |
| Ailsa Craig <i>SIAN2like</i> transcript 2 | CAAGTATGGAGAAGCAAGTGGCATCTTGTTCCTTTTAGAGCTGGTCTAAATAGATGTCGAAAGAGTTGTAGACTGAGGT   | 160 |
| consensus                                 | caagtatggagaagc.....tctaaatagatgtcgaaagagttgtagactgaggt                           | 130 |
|                                           | caagtatggagaaggt.....tctaaatagatgtcgaaagagttgtagactgaggt                          |     |
| <i>Solyc10g086290.1.1</i>                 | GGTTGAATTATCTAAGGCCACATATCAAGAGAGTGGACTTTGCTCTGGATGAAATAGATCTCATTTTGAGACTTCAAG    | 240 |
| Heinz 1706 <i>SIAN2like</i> transcript    | GGTTGAATTATCTAAGGCCACATATCAAGAGAGTGGACTTTGCTCTGGATGAAATAGATCTCATTTTGAGACTTCAAG    | 193 |
| Ailsa Craig <i>SIAN2like</i> transcript1  | GGTTGAATTATCTAAGGCCACATATCAAGAGAGTGGACTTTGCTCTGGATGAAATAGATCTCATTTTGAGACTTCAAG    | 193 |
| Ailsa Craig <i>SIAN2like</i> transcript 2 | GGTTGAATTATCTAAGGCCACATATCAAGAGAGTGGACTTTGCTCTGGATGAAATAGATCTCATTTTGAGACTTCAAG    | 163 |
| consensus                                 | ggttgaattatctaaaggccacatcaagagag.....tctaaatagatgtcgaaagagttgtagactgaggt          |     |
|                                           | ggttgaattatctaaaggccacatcaagagag.....tctaaatagatgtcgaaagagttgtagactgaggt          |     |
| <i>Solyc10g086290.1.1</i>                 | CTTCTAGGCAATAGATGGTCACTTATTTGCTGGGAGACTTCTTGAAGAAGCAGCAACAGATGTGAAAACTATTGGAACAC  | 320 |
| Heinz 1706 <i>SIAN2like</i> transcript    | .....ATGGTCACTTATTTGCTGGGAGACTTCTTGAAGAAGCAGCAACAGATGTGAAAACTATTGGAACAC           | 259 |
| Ailsa Craig <i>SIAN2like</i> transcript1  | .....ATGGTCACTTATTTGCTGGGAGACTTCTTGAAGAAGCAGCAACAGATGTGAAAACTATTGGAACAC           | 259 |
| Ailsa Craig <i>SIAN2like</i> transcript 2 | .....ATGGTCACTTATTTGCTGGGAGACTTCTTGAAGAAGCAGCAACAGATGTGAAAACTATTGGAACAC           | 229 |
| consensus                                 | atggtcacttattgctgggagacttcttgaagaagcagcaaacagatgtgaaaaactattggaacac               |     |
|                                           | atggtcacttattgctgggagacttcttgaagaagcagcaaacagatgtgaaaaactattggaacac               |     |
| <i>Solyc10g086290.1.1</i>                 | ACACCTACACAAGAAAGTTATTAATAACTCCTCCTCAGATACAAGAGAATAAGTACAATAATACCCTCAAGATTATCACTG | 400 |
| Heinz 1706 <i>SIAN2like</i> transcript    | ACACCTACACAAGAAAGTTATTAATAACTCCTCCTCAGATACAAGAGAATAAGTACAATAATACCCTCAAGATTATCACTG | 339 |
| Ailsa Craig <i>SIAN2like</i> transcript1  | ACACCTACACAAGAAAGTTATTAATAACTCCTCCTCAGATACAAGAGAATAAGTACAATAATACCCTCAAGATTATCACTG | 339 |
| Ailsa Craig <i>SIAN2like</i> transcript 2 | ACACCTACACAAGAAAGTTATTAATAACTCCTCCTCAGATACAAGAGAATAAGTACAATAATACCCTCAAGATTATCACTG | 309 |
| consensus                                 | acacctacacaagaagtatttaataactcctcctcagatacaagagataaagtacaataataccctcaagattatcactg  |     |
|                                           | acacctacacaagaagtatttaataactcctcctcagatacaagagataaagtacaataataccctcaagattatcactg  |     |
| <i>Solyc10g086290.1.1</i>                 | AAAGCACTATACTACGACCAGCAAGACAGCAGCTCAACCTCGAACCTTCTCAAGTGAATAAATATTTCTTGGTGC       | 480 |
| Heinz 1706 <i>SIAN2like</i> transcript    | AAAGCACTATACTACGACCAGCAAGACAGCAGCTCAACCTCGAACCTTCTCAAGTGAATAAATATTTCTTGGTGC       | 419 |
| Ailsa Craig <i>SIAN2like</i> transcript1  | AAAGCACTATACTACGACCAGCAAGACAGCAGCTCAACCTCGAACCTTCTCAAGTGAATAAATATTTCTTGGTGC       | 419 |
| Ailsa Craig <i>SIAN2like</i> transcript 2 | AAAGCACTATACTACGACCAGCAAGACAGCAGCTCAACCTCGAACCTTCTCAAGTGAATAAATATTTCTTGGTGC       | 389 |
| consensus                                 | aaagcactatactacgaccagcaagacagcagcctcaacctcgaaaccttctcaagtgaataaataatttcttgggtgc   |     |
|                                           | aaagcactatactacgaccagcaagacagcagcctcaacctcgaaaccttctcaagtgaataaataatttcttgggtgc   |     |
| <i>Solyc10g086290.1.1</i>                 | ACTAACAAATAGTATGATCACAACACATTAGACAAGATGACGAACAACACAACAAGAAATCGCAGTAAATATTTGTGA    | 560 |
| Heinz 1706 <i>SIAN2like</i> transcript    | ACTAACAAATAGTATGATCACAACACATTAGACAAGATGACGAACAACACAACAAGAAATCGCAGTAAATATTTGTGA    | 499 |
| Ailsa Craig <i>SIAN2like</i> transcript1  | ACTAACAAATAGTATGATCACAACACATTAGACAAGATGACGAACAACACAACAAGAAATCGCAGTAAATATTTGTGA    | 499 |
| Ailsa Craig <i>SIAN2like</i> transcript 2 | ACTAACAAATAGTATGATCACAACACATTAGACAAGATGACGAACAACACAACAAGAAATCGCAGTAAATATTTGTGA    | 469 |
| consensus                                 | actaaacaatagatgatcacaacacattagacaagatgacgaacaacacaacaagaatcgagtaaatatttgtga       |     |
|                                           | actaaacaatagatgatcacaacacattagacaagatgacgaacaacacaacaagaatcgagtaaatatttgtga       |     |
| <i>Solyc10g086290.1.1</i>                 | GAAGCCAAACAAAAAACACCGTCACTCGTCTATAGACGATGATGGAGTTCAATGGTGGACAAATTTACTGGAAAATTTGA  | 640 |
| Heinz 1706 <i>SIAN2like</i> transcript    | GAAGCCAAACAAAAAACACCGTCACTCGTCTATAGACGATGATGGAGTTCAATGGTGGACAAATTTACTGGAAAATTTGA  | 579 |
| Ailsa Craig <i>SIAN2like</i> transcript1  | GAAGCCAAACAAAAAACACCGTCACTCGTCTATAGACGATGATGGAGTTCAATGGTGGACAAATTTACTGGAAAATTTGA  | 579 |
| Ailsa Craig <i>SIAN2like</i> transcript 2 | GAAGCCAAACAAAAAACACCGTCACTCGTCTATAGACGATGATGGAGTTCAATGGTGGACAAATTTACTGGAAAATTTGA  | 549 |
| consensus                                 | gaagccaaacaaaaaacacccgtcactcgtctatagacgatgatggagttcaatggaggacaaatttactggaatattgga |     |
|                                           | gaagccaaacaaaaaacacccgtcactcgtctatagacgatgatggagttcaatggaggacaaatttactggaatattgga |     |
| <i>Solyc10g086290.1.1</i>                 | AAGAATTTGAGGAAGAAGCAACAGCAGTATTGAACTTTGAGGAAGAAAATAAGTTGTGCCAAATTTGTTGATGAGGAA    | 720 |
| Heinz 1706 <i>SIAN2like</i> transcript    | AAGAATTTGAGGAAGAAGCAACAGCAGTATTGAACTTTGAGGAAGAAAATAAGTTGTGCCAAATTTGTTGATGAGGAA    | 659 |
| Ailsa Craig <i>SIAN2like</i> transcript1  | AAGAATTTGAGGAAGAAGCAACAGCAGTATTGAACTTTGAGGAAGAAAATAAGTTGTGCCAAATTTGTTGATGAGGAA    | 659 |
| Ailsa Craig <i>SIAN2like</i> transcript 2 | AAGAATTTGAGGAAGAAGCAACAGCAGTATTGAACTTTGAGGAAGAAAATAAGTTGTGCCAAATTTGTTGATGAGGAA    | 629 |
| consensus                                 | aagaatttgaggaagaagcaacagcagatttgaaactttgaggaagaaaataagttgtgccaatttgttattgagga     |     |
|                                           | aagaatttgaggaagaagcaacagcagatttgaaactttgaggaagaaaataagttgttgcgaatttgttattgagga    |     |
| <i>Solyc10g086290.1.1</i>                 | CATAATTCACAACCACTGCAACATGGAGAAAATGATGACTTTTCAGTTGATATTGACCTATGGAATCTATTTAATTAG    | 798 |
| Heinz 1706 <i>SIAN2like</i> transcript    | CATAATTCACAACCACTGCAACATGGAGAAAATGATGACTTTTCAGTTGATATTGACCTATGGAATCTATTTAATTAG    | 737 |
| Ailsa Craig <i>SIAN2like</i> transcript1  | CATAATTCACAACCACTGCAACATGGAGAAAATGATGACTTTTCAGTTGATATTGACCTATGGAATCTATTTAATTAG    | 737 |
| Ailsa Craig <i>SIAN2like</i> transcript 2 | CATAATTCACAACCACTGCAACATGGAGAAAATGATGACTTTTCAGTTGATATTGACCTATGGAATCTATTTAATTAG    | 707 |
| consensus                                 | cataatccaacaacctgcaacatggagaaaatgatgacttttcagttgatattgacctatggaatctatttaattag     |     |
|                                           | cataatccaacaacctgcaacatggagaaaatgatgacttttcagttgatattgacctatggaatctatttaattag     |     |

**B**

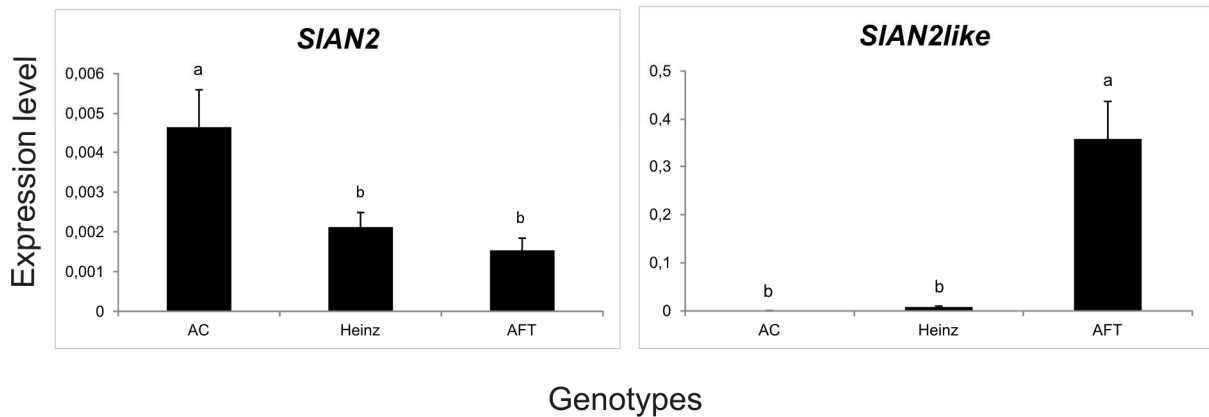

**Supplemental Figure 6. *SIAN2like* in Heinz fruits is spliced and expressed similarly to Ailsa Craig fruits.**

**(A)** Clustal alignment of the *Solyc10g086290.1.1* cds (SolGenomics), the transcript sequence cloned from the Heinz 1706 fruit peel, and the two transcript sequences cloned from the Ailsa Craig fruit peel and. **(B)** qPCR analysis of the genes *SIAN2* and *SIAN2like* carried out in the peel of Ailsa Craig (AC), Heinz 1706 and *Aft* fruits at the mature green stage. Data are means of six biological replicates  $\pm$  SE. One-way ANOVA with Tukey's HSD post-hoc test was performed. Different letters indicate significant differences at  $P \leq 0.05$ .

A

```

SIAN2like_WT_1      MNIARTLGVRKGSWTEDEDILLRKCIDRYGEGKWHLVFPFRAGLNRCKRSCLRWLNLYLRP
SIAN2like_WT_2      MNIARTLGVRKGSWTEDEDILLRKCIDRYGEG-----LNRCKRSCLRWLNLYLRP
Solyc10g086290.1.1  MNIARTLGVRKGSWTEDEDILLRKCIDRYGEGKWHLVFPFRAGLNRCKRSCLRWLNLYLRP
*****

SIAN2like_WT_1      HIKRD-----GHLLG-----
SIAN2like_WT_2      HIKRD-----GHLLG-----
Solyc10g086290.1.1  HIKRGDFALDEIDLILRLHLKLLGNRWSLIAGRLPGRANDVKNYWNLHLKLLITPPQI
*****
R2
*****

SIAN2like_WT_1      -----
SIAN2like_WT_2      -----
Solyc10g086290.1.1  QENRYNNTLKIITESTILRPRREGPQPRTESSENNISWCTNNSMTITNLDKDDQHNKE
*****

SIAN2like_WT_1      -----DFLEEQQTM-----
SIAN2like_WT_2      -----DFLEEQQTMKIGTHT-----
Solyc10g086290.1.1  IAVNICEKPTKTPSSSIDDDGVQWNLNLENWKEFEEETAVLNFEENKLLPNLLYEE
*****
:* **: :

SIAN2like_WT_1      -----
SIAN2like_WT_2      YTRSY-----
Solyc10g086290.1.1  HNSTTMQHGENDDFVSDIDLNLNLFN
*****

R3
*****

```

B

```

SIAN2like_WT      ATGAATATGCCAAGACATGGGAGTGAGAAAAGGTTCATGGACTGAAATGAAGATATT
SIAN2like_Aft     ATGAATATGCCAAGACATGGGAGTGAGAAAAGGTTCATGGACTGAAATGAAGATATT
*****

SIAN2like_WT      CTTTTCAGGAAATGATTGACACAGTATGGAGAAGGAAAGTGCATCTTCTCCTTTTAGA
SIAN2like_Aft     CTTTTCAGGAAATGATTGACACAGTATGGAGAAGGAAAGTGCATCTTCTCCTTTTAGA
*****

SIAN2like_WT      CCTGTAAAGCAGAAATTAAGATTTTATCTTTATTAATTTAAATTTTATGATAAATA
SIAN2like_Aft     CCTGTAAAGCAGAAATTAAGATTTTATCTTTATTAATTTAAATTTTATGATAAATA
*****

SIAN2like_WT      AGTTCTAAATTTATGTAGATTTAAGTAAATTTGTTAATGCAGAAATAATTTAGGC
SIAN2like_Aft     AGTTCTAAATTTATGTAGATTTAAGTAAATTTGTTAATGCAGAAATAATTTAGGC
*****

SIAN2like_WT      AAAATCTATTAGATTACTAAATTTCTCTTTTAAGAAAAGGAAACTTAACTTTTGT
SIAN2like_Aft     AAAATCTATTAGATTACTAAATTTCTCTTTTAAGAAAAGGAAACTTAACTTTTGT
*****

SIAN2like_WT      GTGATAGTGGCGTCCCAACCTATACTTAGCATGAATAGCATTTTCATGCCTCCTTTT
SIAN2like_Aft     GTGATAGTGGCGTCCCAACCTATACTTAGCATGAATAGCATTTTCATGCCTCCTTTT
*****

SIAN2like_WT      ATTACGAGTCATAAATCAATTTCTTAGGAGTTACAAATTAATATAAGATATATTA
SIAN2like_Aft     ATTACGAGTCATAAATCAATTTCTTAGGAGTTACAAATTAATATAAGATATATTA
*****

SIAN2like_WT      GTTAAATTTTTTGTAGTTATATATAAATCTACCAAAAAAATTAAGTCTCGTTCAATC
SIAN2like_Aft     GTTAAATTTTTTGTAGTTATATATAAATCTACCAAAAAAATTAAGTCTCGTTCAATC
*****

SIAN2like_WT      CACAAATCCCACTTACTATTATTCACTGATATATGCAGTCTAAATAGATGTCGAA
SIAN2like_Aft     CACAAATCCCACTTACTATTATTCACTGATATATGCAGTCTAAATAGATGTCGAA
*****

SIAN2like_WT      AGAGTTCTAGACTGAGGTGGTTGAAATTAATCTAAGGCCACATATCAAGAGAGGTGACTTG
SIAN2like_Aft     AGAGTTCTAGACTGAGGTGGTTGAAATTAATCTAAGGCCACATATCAAGAGAGGTGACTTG
*****

SIAN2like_WT      CTCTGGATGAAATAGATCTCATTTTGTAGACTTCACAAGCTTCAGGCAATAGGCAATCA
SIAN2like_Aft     CTCTGGATGAAATAGATCTCATTTTGTAGACTTCACAAGCTTCAGGCAATAGGCAATCA
*****

SIAN2like_WT      AAAATTTCTTAAATAATTTAAAAATTTATGTACATATATATTCACGAAAAGTAAT
SIAN2like_Aft     AAAATTTCTTAAATAATTTAAAAATTTATGTACATATATATTCACGAAAAGTAAT
*****

SIAN2like_WT      TTTTGACATAAAATTTCTACATACACTAGTCTCTCGAATATATTAGTAAGTTATCTT
SIAN2like_Aft     TTTTGACATAAAATTTCTACATACACTAGTCTCTCGAATATATTAGTAAGTTATCTT
*****

SIAN2like_WT      TGATGCCATATTTTATATTTTTGGTTTATGTTGTCATTAATGCTGGGAGACTTCC
SIAN2like_Aft     TGATGCCATATTTTATATTTTTGGTTTATGTTGTCATTAATGCTGGGAGACTTCC
*****

SIAN2like_WT      GGAAGAACACCAACGATGTGAAAAACTATTGGAACACACACCTACACAAAGATTATTA
SIAN2like_Aft     GGAAGAACACCAACGATGTGAAAAACTATTGGAACACACACCTACACAAAGATTATTA
*****

SIAN2like_WT      ATAACCTCTCTAGATACAAGAGAATAAGTACAATAATACCCTCAAGATTACTGAA
SIAN2like_Aft     ATAACCTCTCTAGATACAAGAGAATAAGTACAATAATACCCTCAAGATTACTGAA
*****

SIAN2like_WT      AGCACTACTACTAGACCACGACCAAGACCAGGACCTCAACCTCGAACCTTCTCAAGTGAA
SIAN2like_Aft     AGCACTACTACTAGACCACGACCAAGACCAGGACCTCAACCTCGAACCTTCTCAAGTGAA
*****

SIAN2like_WT      AATAATATTTCTTGGTGCATAACAATAGTATGATCACAACACATAGACAAAAGATGAC
SIAN2like_Aft     AATAATATTTCTTGGTGCATAACAATAGTATGATCACAACACATAGACAAAAGATGAC
*****

SIAN2like_WT      GAACAACAACAAGAAATCGCAGTAAATTTTGTGAGAAGCAACAACAAAAACCCG
SIAN2like_Aft     GAACAACAACAAGAAATCGCAGTAAATTTTGTGAGAAGCAACAACAAAAACCCG
*****

SIAN2like_WT      TCATCGTCTATAGACGATGATGGAGTTCAATGGTGGACAAATTTACTGAAAAATGGAAA
SIAN2like_Aft     TCATCGTCTATAGACGATGATGGAGTTCAATGGTGGACAAATTTACTGAAAAATGGAAA
*****

SIAN2like_WT      GAATTTGAGGAAGAAGCAACAGCAGTATTGAACCTTGAGGAAGAAAATAGTTGTTCCA
SIAN2like_Aft     GAATTTGAGGAAGAAGCAACAGCAGTATTGAACCTTGAGGAAGAAAATAGTTGTTCCA
*****

SIAN2like_WT      AATTTGTTGTGAGGAACATAAATCAACAACCATGCAACATGGAGAAAATGATGACTTT
SIAN2like_Aft     AATTTGTTGTGAGGAACATAAATCAACAACCATGCAACATGGAGAAAATGATGACTTT
*****

SIAN2like_WT      TCAGTTGATATTGACCTATGGAATCTATTTAATTAG
SIAN2like_Aft     TCAGTTGATATTGACCTATGGAATCTATTTAATTAG
*****

```

**Supplemental Figure 7. Nucleotide and amino acid polymorphisms in different versions of SIAN2like.**

**(A)** ClustalW alignment of the genomic sequences of *SIAN2like*<sup>WT</sup>, with exon boundaries produced by the “canonical” splicing, and *SIAN2like*<sup>Aft</sup>. Exons are boxed in green. The symbol “\*” indicates a perfect alignment. Single nucleotide and other polymorphisms between WT and *Aft* sequences are highlighted in yellow. **(B)** ClustalW alignment of the protein sequence SIAN2like<sup>WT</sup> from SOL Genomics Network database (Solyc10g086290.1.1) and the two shorter polypeptides SIAN2like\_WT\_1 and SIAN2like\_WT\_2 produced from the two transcripts cloned in WT fruit peel. R2 and R3 MYB domains are underlined. In the Solyc10g086290.1.1 sequence, the [DE]Lx2[RK]x3Lx6Lx3R motif containing the bHLH-binding site (Zimmermann et al., 2004) is boxed in grey, the aminoacidic signature [A/S/G]NDV typical of dicot R2R3 MYBs promoting anthocyanin (Lin-Wang et al., 2010; Heppel et al., 2013) is boxed in light purple and the KPRPR[ST]F motif, conserved in Arabidopsis MYBs involved in anthocyanin synthesis (Stracke et al., 2001), is boxed in green. Symbols are as follows: “\*” indicates perfect alignment; “:” indicates a site belonging to group exhibiting strong similarity; and “.” indicates a site belonging to a group exhibiting weak similarity.

SLAN2like<sup>WT</sup> ATGAATATGCGCAAGACATGGGAGTCAGAAAAGGCTTCATGGACTGAAGATCAAGATATCTTTTIGAGGAAATGTATTGA 80  
 SpiAN2like ATGAATATGCGCAAGACATGGGAGTCAGAAAAGGCTTCATGGACTGAAGATCAAGATATCTTTTIGAGGAAATGTATTGA 80  
 SLAN2like<sup>ΔTt</sup> ATGAATATGCGCAAGACATGGGAGTCAGAAAAGGCTTCATGGACTGAAGATCAAGATATCTTTTIGAGGAAATGTATTGA 80  
 SpeAN2like ATGAATATGCGCAAGACATGGGAGTCAGAAAAGGCTTCATGGACTGAAGATCAAGATATCTTTTIGAGGAAATGTATTGA 80  
 ScAN2like ATGAATATGCGCAAGACATGGGAGTCAGAAAAGGCTTCATGGACTGAAGATCAAGATATCTTTTIGAGGAAATGTATTGA 80  
 SlyAN2like ATGAATATGCGCAAGACATGGGAGTCAGAAAAGGCTTCATGGACTGAAGATCAAGATATCTTTTIGAGGAAATGTATTGA 80  
 consensus atgaatat gc aagacattgggagt agaaaaggcttcattggactgaaga gaagat tcttttgaggaaatgtattga

SLAN2like<sup>WT</sup> CAAGTATGCGAAGGAAAGTGGCATCTGTTCCTTTTACAGCIGGTAAGCCAAATTAAGATTTTACTTTTAAATTTT 160  
 SpiAN2like CAAGTATGCGAAGGAAAGTGGCATCTGTTCCTTTTACAGCIGGTAAGCCAAATTAAGATTTTACTTTTAAATTTT 160  
 SLAN2like<sup>ΔTt</sup> CAAGTATGCGAAGGAAAGTGGCATCTGTTCCTTTTACAGCIGGTAAGCCAAATTAAGATTTTACTTTTAAATTTT 160  
 SpeAN2like CAAGTATGCGAAGGAAAGTGGCATCTGTTCCTTTTACAGCIGGTAAGCCAAATTAAGATTTTACTTTTAAATTTT 160  
 ScAN2like CAAGTATGCGAAGGAAAGTGGCATCTGTTCCTTTTACAGCIGGTAAGCCAAATTAAGATTTTACTTTTAAATTTT 160  
 SlyAN2like CAAGTATGCGAAGGAAAGTGGCATCTGTTCCTTTTACAGCIGGTAAGCCAAATTAAGATTTTACTTTTAAATTTT 160  
 consensus caagtatggagaaggaaagtggcatctgttctctt tagactggttaag aaatta gattt a ttttat atttt

SLAN2like<sup>WT</sup> AAATTTTATGATAATAATAAAGTCTTAAATTTATCTAGATTAAGTATAAATTTCTTAAIGCAAAAATAATATTAGG 239  
 SpiAN2like AAATTTTATGATAATAATAAAGTCTTAAATTTATCTAGATTAAGTATAAATTTCTTAAIGCAAAAATAATATTAGG 239  
 SLAN2like<sup>ΔTt</sup> AAATTTTATGATAATAATAAAGTCTTAAATTTATCTAGATTAAGTATAAATTTCTTAAIGCAAAAATAATATTAGG 238  
 SpeAN2like AAATTTTATGATAATAATAAAGTCTTAAATTTATCTAGATTAAGTATAAATTTCTTAAIGCAAAAATAATATTAGG 239  
 ScAN2like AAATTTTATGATAATAATAAAGTCTTAAATTTATCTAGATTAAGTATAAATTTCTTAAIGCAAAAATAATATTAGG 239  
 SlyAN2like AAATTTTATGATAATAATAAAGTCTTAAATTTATCTAGATTAAGTATAAATTTCTTAAIGCAAAAATAATATTAGG 239  
 consensus aaattttatgataataa taagt taaatttatctagat taagt a aatttgtaatgcaaaaa ta tat tag

SLAN2like<sup>WT</sup> CAAAATCTTTAGATTTTACAAATTTCTTTTAAAGAAAAGAGAACTTAACTTTTCTTGTGATAGTGGCGTCCCAAC 319  
 SpiAN2like CAAAATCTTTAGATTTTACAAATTTCTTTTAAAGAAAAGAGAACTTAACTTTTCTTGTGATAGTGGCGTCCCAAC 319  
 SLAN2like<sup>ΔTt</sup> CAAAATCTTTAGATTTTACAAATTTCTTTTAAAGAAAAGAGAACTTAACTTTTCTTGTGATAGTGGCGTCCCAAC 317  
 SpeAN2like CAAAATCTTTAGATTTTACAAATTTCTTTTAAAGAAAAGAGAACTTAACTTTTCTTGTGATAGTGGCGTCCCAAC 319  
 ScAN2like CAAAATCTTTAGATTTTACAAATTTCTTTTAAAGAAAAGAGAACTTAACTTTTCTTGTGATAGTGGCGTCCCAAC 319  
 SlyAN2like CAAAATCTTTAGATTTTACAAATTTCTTTTAAAGAAAAGAGAACTTAACTTTTCTTGTGATAGTGGCGTCCCAAC 320  
 consensus caaaaatct tttagatt tac aaatttctttttaaagaaaagagaaactta cctt tgtgtgatagtgccgt c aac

SLAN2like<sup>WT</sup> CTATAACTCTAGCATGAATAGCATTTCATGCTCCTTTTATTATCCGACTGATTAATCAATTTTCTTAGGAGTTTACAA 399  
 SpiAN2like CTATAACTCTAGCATGAATAGCATTTCATGCTCCTTTTATTATCCGACTGATTAATCAATTTTCTTAGGAGTTTACAA 399  
 SLAN2like<sup>ΔTt</sup> CTATAACTCTAGCATGAATAGCATTTCATGCTCCTTTTATTATCCGACTGATTAATCAATTTTCTTAGGAGTTTACAA 397  
 SpeAN2like CTATAACTCTAGCATGAATAGCATTTCATGCTCCTTTTATTATCCGACTGATTAATCAATTTTCTTAGGAGTTTACAA 399  
 ScAN2like CTATAACTCTAGCATGAATAGCATTTCATGCTCCTTTTATTATCCGACTGATTAATCAATTTTCTTAGGAGTTTACAA 399  
 SlyAN2like CTATAACTCTAGCATGAATAGCATTTCATGCTCCTTTTATTATCCGACTGATTAATCAATTTTCTTAGGAGTTTACAA 400  
 consensus tcaactctagcatgaatagcatttca g ctccttt ttatt ga tc t aat a ttt g taggagtttacaa

SLAN2like<sup>WT</sup> ATTAATATGACATATATTTACTTAAATTTTATGTTTATATATGAAATCAATCCAAATAATTAAGGTTTCTTCAAT 479  
 SpiAN2like ATTAATATGACATATATTTACTTAAATTTTATGTTTATATATGAAATCAATCCAAATAATTAAGGTTTCTTCAAT 479  
 SLAN2like<sup>ΔTt</sup> ATTAATATGACATATATTTACTTAAATTTTATGTTTATATATGAAATCAATCCAAATAATTAAGGTTTCTTCAAT 475  
 SpeAN2like ATTAATATGACATATATTTGCTTAAATTTTATGTTTATATATGAAATCAATCCAAATAATTAAGGTTTCTTCAAT 477  
 ScAN2like ATTAATATGACATATTTGCTTAAATTTTATGTTTATATATGAAATCAATCCAAATAATTAAGGTTTCTTCAAT 476  
 SlyAN2like ATTAATATGACATATTTGCTTAAATTTTATGTTTATATATGAAATCAATCCAAATAATTAAGGTTTCTTCAAT 477  
 consensus t aaata a a atatt ttaa ttttt agt atata aa at ta aa aaatta t t c ttcaa

SLAN2like<sup>WT</sup> CCACAATCCCTACTTACATTAATTTCTATGTAATATGACAGGCTAAATAGATGTCGAAAGAGTTGTAGACTGAGGTG 559  
 SpiAN2like CCACAATCCCTACTTACATTAATTTCTATGTAATATGACAGGCTAAATAGATGTCGAAAGAGTTGTAGACTGAGGTG 559  
 SLAN2like<sup>ΔTt</sup> CCACAATCCCTACTTACATTAATTTCTATGTAATATGACAGGCTAAATAGATGTCGAAAGAGTTGTAGACTGAGGTG 555  
 SpeAN2like CCACAATCCCTACTTACATTT...ICATGCGAATATATGACAGGCTAAATAGATGTCGAAAGAGTTGTAGACTGAGGTG 554  
 ScAN2like CCATAAATCCCTACTTACATTT...ICATGCGAATATATGACAGGCTAAATAGATGTCGAAAGAGTTGTAGACTGAGGTG 553  
 SlyAN2like CCACAATCCCTACTTACATTT...ICATGCGAATATATGACAGGCTAAATAGATGTCGAAAGAGTTGTAGACTGAGGTG 554  
 consensus cca aatcc acttac att tca a tatatgcaggctcaaatagatgtcgaaagagttgtagactgaggtg

SLAN2like<sup>WT</sup> GTTGAATATCTAAGGCCACATATCAAGAGAGGTCACCTTTGCTTGGATGAAATAGATCTCTTTTGTAGACTTCAAGC 639  
 SpiAN2like GTTGAATATCTAAGGCCACATATCAAGAGAGGTCACCTTTGCTTGGATGAAATAGATCTCTTTTGTAGACTTCAAGC 639  
 SLAN2like<sup>ΔTt</sup> GTTGAATATCTAAGGCCACATATCAAGAGAGGTCACCTTTGCTTGGATGAAATAGATCTCTTTTGTAGACTTCAAGC 635  
 SpeAN2like GTTGAATATCTAAGGCCACATATCAAGAGAGGTCACCTTTGCTTGGATGAAATAGATCTCTTTTGTAGACTTCAAGC 634  
 ScAN2like GTTGAATATCTAAGGCCACATATCAAGAGAGGTCACCTTTGCTTGGATGAAATAGATCTCTTTTGTAGACTTCAAGC 633  
 SlyAN2like GTTGAATATCTAAGGCCACATATCAAGAGAGGTCACCTTTGCTTGGATGAAATAGATCTCTTTTGTAGACTTCAAGC 634  
 consensus gttgaattatctaaggccacatatcaagagaggtcactttgctt g gatgaaatagatctc tttt agacttcacaagc

SLAN2like<sup>WT</sup> TTCTAGGCAATAGGCAATCAAAATTTCTGTTAAAAAATTTAAAAATTATGTAATATATATTTCTGAAAAGTAA 719  
 SpiAN2like TTCTAGGCAATAGGCAATCAAAATTTCTGTTAAAAAATTTAAAAATTATGTAATATATATTTCTGAAAAGTAA 719  
 SLAN2like<sup>ΔTt</sup> TTCTAGGCAATAGGCAATCAAAATTTCTGTTAAAAAATTTAAAAATTATGTAATATATATTTCTGAAAAGTAA 713  
 SpeAN2like TTCTAGGCAATAGGCAATCAAAATTTCTGTTAAAAAATTTAAAAATTATGTAATATATATTTCTGAAAAGTAA 712  
 ScAN2like TTCTAGGCAATAGGCAATCAAAATTTCTGTTAAAAAATTTAAAAATTATGTAATATATATTTCTGAAAAGTAA 711  
 SlyAN2like TTCTAGGCAATAGGCAATCAAAATTTCTGTTAAAAAATTTAAAAATTATGTAATATATATTTCTGAAAAGTAA 712  
 consensus ttctaggcaataggcaaa t a aaattt gttaaaa att aaaaattat a atatat t a gaaaag aa

|                          |                                                                                              |      |
|--------------------------|----------------------------------------------------------------------------------------------|------|
| SIAN2like <sup>WT</sup>  | <u>T</u> TTTGACATATAAATCTGTACATACTACTCTCCGATATAATATACTAAGTATCTTTGATCCATATTTTATAT             | 799  |
| SpiAN2like               | <u>T</u> TTTGACATATAAATCTGTACATACTACTCTCCGATATAATATACTAAGTATCTTTGATCCATATTTTATAT             | 799  |
| SIAN2like <sup>Aft</sup> | <u>C</u> TTTGACATACAATTTGTGTACATACTACTCTCCGATATAATATACTAAGTATCTTTGATCCATATTTTATAT            | 793  |
| SpeAN2like               | <u>T</u> TTTGACATATAAATCTGTACATACTACTCTCCGATATAATATACTAAGTATCTTTGATCCATATTTTATAT             | 792  |
| ScAN2like                | <u>C</u> TTTGACATATAAATCTGTGTACATACTACTCTCCGATATAATATACTAAGTATCTTTGATCCATATTTTATAT           | 791  |
| SlyAN2like               | <u>T</u> TTTGACATATAAATCTGTGTACATACTACTCTCCGATATAATATACTAAGTATCTTTGATCCATATTTTATAT           | 791  |
| consensus                | <u>t</u> tttgacata aaat t gtacatact tct cg atata tataagtaagt tctttgatgc atatttt t            |      |
|                          |                                                                                              |      |
| SIAN2like <sup>WT</sup>  | <u>...</u> <u>T</u> TTTTCGTTTACGTGTCACCTTATTGCTGGGAGACTCCGGGAAGAACAGCAAACGATGTGAAAACTATGGAAC | 876  |
| SpiAN2like               | <u>...</u> <u>T</u> TTTTCGTTTACGTGTCACCTTATTGCTGGGAGACTCCGGGAAGAACAGCAAACGATGTGAAAACTATGGAAC | 876  |
| SIAN2like <sup>Aft</sup> | <u>...</u> <u>T</u> TTTTCGTTTACGTGTCACCTTATTGCTGGGAGACTCCGGGAAGAACAGCAAACGATGTGAAAACTATGGAAC | 870  |
| SpeAN2like               | <u>A</u> TTTTCGTTTACGTGTCACCTTATTGCTGGGAGACTCCGGGAAGAACAGCAAACGATGTGAAAACTATGGAAC            | 872  |
| ScAN2like                | <u>...</u> <u>T</u> TTTTCGTTTACGTGTCACCTTATTGCTGGGAGACTCCGGGAAGAACAGCAAACGATGTGAAAACTATGGAAC | 867  |
| SlyAN2like               | <u>A</u> TTTTCGTTTACGTGTCACCTTATTGCTGGGAGACTCCGGGAAGAACAGCAAACGATGTGAAAACTATGGAAC            | 869  |
| consensus                | <u>t</u> ttt gtttag tggtcacttattgctgggagactcc ggaagaacagcaaacgatgtgaaaaactattggaac           |      |
|                          |                                                                                              |      |
| SIAN2like <sup>WT</sup>  | <u>A</u> CACACCTACACAAGAAGTTATTAATAACCTCCCTCCGATACAAGAGAATAAGTACAATAATACCCCTCAAGATTATCAC     | 956  |
| SpiAN2like               | <u>A</u> CACACCTACACAAGAAGTTATTAATAACCTCCCTCCGATACAAGAGAATAAGTACAATAATACCCCTCAAGATTATCAC     | 956  |
| SIAN2like <sup>Aft</sup> | <u>A</u> CACACCTACACAAGAAGTTATTAATAACCTCCCTCCGATACAAGAGAATAAGTACAATAATACCCCTCAAGATTATCAC     | 947  |
| SpeAN2like               | <u>A</u> CACACCTACACAAGAAGTTATTAATAACCTCCCTCCGATACAAGAGAATAAGTACAATAATACCCCTCAAGATTATCAC     | 952  |
| ScAN2like                | <u>A</u> CACACCTACACAAGAAGTTATTAATAACCTCCCTCCGATACAAGAGAATAAGTACAATAATACCCCTCAAGATTATCAC     | 947  |
| SlyAN2like               | <u>A</u> CACACCTACACAAGAAGTTATTAATAACCTCCCTCCGATACAAGAGAATAAGTACAATAATACCCCTCAAGATTATCAC     | 946  |
| consensus                | <u>c</u> acacctacacaagaagtta ataactcc c gatacaagagaataaagtacaataa accctcaagattatcac          |      |
|                          |                                                                                              |      |
| SIAN2like <sup>WT</sup>  | <u>T</u> GAAAGCACTATCTACGACACGACCAACCCAGACCTCCACCTCGAACCTTCTCAAGTGAAAATAATATTTCTTGGT         | 1036 |
| SpiAN2like               | <u>T</u> GAAAGCACTATCTACGACACGACCAACCCAGACCTCCACCTCGAACCTTCTCAAGTGAAAATAATATTTCTTGGT         | 1036 |
| SIAN2like <sup>Aft</sup> | <u>T</u> GAAAGCACTAT.....ACTACGACCAACCCAGACCTCCACCTCGAACCTTCTCAAGTGAAAATAATATTTCTTGGT        | 1021 |
| SpeAN2like               | <u>T</u> GAAAGCACTATCTACGACACGACCAACCCAGACCTCCACCTCGAACCTTCTCAAGTGAAAATAATATTTCTTGGT         | 1032 |
| ScAN2like                | <u>T</u> GAAAGCACTATCTACGACACGACCAACCCAGACCTCCACCTCGAACCTTCTCAAGTGAAAATAATATTTCTTGGT         | 1027 |
| SlyAN2like               | <u>T</u> GAAAGCACTATCTACGACACGACCAACCCAGACCTCCACCTCGAACCTTCTCAAGTGAAAATAATATTTCTTGGT         | 1026 |
| consensus                | <u>t</u> aaagcactat ac acgacca g cca gacctc acctcg ac tt tcaagtgaaaataatatttcttgggt          |      |
|                          |                                                                                              |      |
| SIAN2like <sup>WT</sup>  | <u>GC</u> ACTAACAAATGATGATCACAAACACATTAGACAAAGATGACGAACAACCAACCAAGAAATCGAGTAAATATTTGT        | 1116 |
| SpiAN2like               | <u>GC</u> ACTAACAAATGATGATCACAAACACATTAGACAAAGATGACGAACAACCAACCAAGAAATCGAGTAAATATTTGT        | 1116 |
| SIAN2like <sup>Aft</sup> | <u>GC</u> ACTAACAAATGATGATCACAAACACATTAGACAAAGATGACGAACAACCAACCAAGAAATCGAGTAAATATTTGT        | 1101 |
| SpeAN2like               | <u>GC</u> ACTAACAAATGATGATCACAAACACATTAGACAAAGATGACGAACAACCAACCAAGAAATCGAGTAAATATTTGT        | 1112 |
| ScAN2like                | <u>GC</u> ACTAACAAATGATGATCACAAACACATTAGACAAAGATGACGAACAACCAACCAAGAAATCGAGTAAATATTTGT        | 1107 |
| SlyAN2like               | <u>GC</u> ACTAACAAATGATGATCACAAACACATTAGACAAAGATGACGAACAACCAACCAAGAAATCGAGTAAATATTTGT        | 1106 |
| consensus                | <u>g</u> cactaacaat gtatgatcacaacacattagacaagaatgacgaacaa aac aagaatcg agtaaatattgtt         |      |
|                          |                                                                                              |      |
| SIAN2like <sup>WT</sup>  | <u>G</u> AGAAGCCAACAAPAAAACCCGTCATCGTC...TATAGACGATGATGGACTTAATGGTGGACAAATTTACGGAAAA         | 1193 |
| SpiAN2like               | <u>G</u> AGAAGCCAACAAPAAAACCCGTCATCGTC...TATAGACGATGATGGACTTAATGGTGGACAAATTTACGGAAAA         | 1185 |
| SIAN2like <sup>Aft</sup> | <u>G</u> AGAAGCCAACAAPAAAACCCGTCATCGTC...TATAGACGATGATGGACTTAATGGTGGACAAATTTACGGAAAA         | 1178 |
| SpeAN2like               | <u>G</u> AGAAGCCAACAAPAAAACCCGTCATCGTC...TATAGACGATGATGGACTTAATGGTGGACAAATTTACGGAAAA         | 1192 |
| ScAN2like                | <u>G</u> AGAAGCCAACAAPAAAACCCGTCATCGTC...TATAGACGATGATGGACTTAATGGTGGACAAATTTACGGAAAA         | 1184 |
| SlyAN2like               | <u>G</u> AGAAGCCAACAAPAAAACCCGTCATCGTC...TATAGACGATGATGGACTTAATGGTGGACAAATTTACGGAAAA         | 1183 |
| consensus                | <u>g</u> agaagccaacaa a aaac ccgtc agacgatga ggagt aatgggtggacaaatttac gaaaa                 |      |
|                          |                                                                                              |      |
| SIAN2like <sup>WT</sup>  | <u>T</u> TGGAAGAATTTGAGGAAGAAGCAACAGCAGTATGACCTTTCAGGAAGAAAATA...CTTCTCCAAATTTGTTCT          | 1270 |
| SpiAN2like               | <u>T</u> TGGAAGAATTTGAGGAAGAAGCAACAGCAGTATGACCTTTCAGGAAGAAAATA...CTTCTCCAAATTTGTTCT          | 1262 |
| SIAN2like <sup>Aft</sup> | <u>T</u> TGGAAGAATTTGAGGAAGAAGCAACAGCAGTATGACCTTTCAGGAAGAAAATA...CTTCTCCAAATTTGTTCT          | 1255 |
| SpeAN2like               | <u>T</u> TGGAAGAATTTGAGGAAGAAGCAACAGCAGTATGACCTTTCAGGAAGAAAATA...CTTCTCCAAATTTGTTCT          | 1269 |
| ScAN2like                | <u>T</u> TGGAAGAATTTGAGGAAGAAGCAACAGCAGTATGACCTTTCAGGAAGAAAATA...CTTCTCCAAATTTGTTCT          | 1261 |
| SlyAN2like               | <u>T</u> TGGAAGAATTTGAGGAAGAAGCAACAGCAGTATGACCTTTCAGGAAGAAAATA...CTTCTCCAAATTTGTTCT          | 1263 |
| consensus                | <u>t</u> tggaaagaatttgaggaagaagca cagcagta tga ctttgaggaagaaaataa gttgtt ccaaattgtt t        |      |
|                          |                                                                                              |      |
| SIAN2like <sup>WT</sup>  | <u>A</u> TGAGGACATAAATTC AACACCATGCAACATGGAGAAAATGATGACTTTTCAGTTGATATTGACCIATGGAATCTAATTT    | 1350 |
| SpiAN2like               | <u>A</u> TGAGGACATAAATTC AACACCATGCAACATGGAGAAAATGATGACTTTTCAGTTGATATTGACCIATGGAATCTAATTT    | 1342 |
| SIAN2like <sup>Aft</sup> | <u>A</u> TGAGGACATAAATTC AACACCATGCAACATGGAGAAAATGATGACTTTTCAGTTGATATTGACCIATGGAATCTAATTT    | 1335 |
| SpeAN2like               | <u>A</u> TGAGGACATAAATTC AACACCATGCAACATGGAGAAAATGATGACTTTTCAGTTGATATTGACCIATGGAATCTAATTT    | 1349 |
| ScAN2like                | <u>A</u> TGAGGACATAAATTC AACACCATGCAACATGGAGAAAATGATGACTTTTCAGTTGATATTGACCIATGGAATCTAATTT    | 1341 |
| SlyAN2like               | <u>A</u> TGAGGACATAAATTC AACACCATGCAACATGGAGAAAATGATGACTTTTCAGTTGATATTGACCIATGGAATCTAATTT    | 1343 |
| consensus                | <u>t</u> gagg a ataattcaac accatgcaacatggagaaaatgatgacttttcagttgatattgacctatggaatctattt      |      |
|                          |                                                                                              |      |
| SIAN2like <sup>WT</sup>  | <u>A</u> ATTAG                                                                               | 1356 |
| SpiAN2like               | <u>A</u> ATTAG                                                                               | 1348 |
| SIAN2like <sup>Aft</sup> | <u>A</u> ATTAG                                                                               | 1341 |
| SpeAN2like               | <u>A</u> ATTAG                                                                               | 1355 |
| ScAN2like                | <u>A</u> ATTAG                                                                               | 1347 |
| SlyAN2like               | <u>A</u> ATTAG                                                                               | 1349 |
| consensus                | <u>a</u> attag                                                                               |      |

### Supplemental Figure 8. AN2like in different tomato species.

Alignment of AN2like gene sequences of *S. lycopersicum* (SIAN2like<sup>WT</sup>), *Aft* (SIAN2like<sup>Aft</sup>), *S. pimpinellifolium* (SpiAN2like), *S. pennellii* (SpeAN2like), *S. chilense* (ScAN2like) and *S. lycopersicoides* (SlyAN2like). Green lines underline exons.

**Solyc10g086250 expression profile**

| ID    | genotype | sample                                 | normalized expression (RPKM) |
|-------|----------|----------------------------------------|------------------------------|
| S0584 | Heinz    | Heinz unopened flower buds             | 1.52                         |
| S0585 | Heinz    | Heinz fully opened flowers             | 1.59                         |
| S0586 | Heinz    | Heinz 1 cm fruits                      | 0                            |
| S0587 | Heinz    | Heinz 2 cm fruits                      | 0                            |
| S0588 | Heinz    | Heinz 3 cm fruits                      | 0                            |
| S0589 | Heinz    | Heinz mature green fruits              | 0.15                         |
| S0590 | Heinz    | Heinz breaker fruits                   | 0                            |
| S0591 | Heinz    | Heinz breaker+10 fruits                | 0                            |
| S0592 | Heinz    | Heinz roots                            | 0.43                         |
| S0593 | Heinz    | Heinz leaves                           | 9.92                         |
| S0594 |          | pimpinellifolium immature green fruits | 0.56                         |
| S0595 |          | pimpinellifolium breaker fruits        | 0.06                         |
| S0596 |          | pimpinellifolium breaker+5 fruits      | 0                            |
| S0597 |          | pimpinellifolium leaves                | 4.08                         |

**Solyc10g086260 expression profile**

| ID    | genotype | sample                                 | normalized expression (RPKM) |
|-------|----------|----------------------------------------|------------------------------|
| S0584 | Heinz    | Heinz unopened flower buds             | 0                            |
| S0585 | Heinz    | Heinz fully opened flowers             | 0                            |
| S0586 | Heinz    | Heinz 1 cm fruits                      | 0                            |
| S0587 | Heinz    | Heinz 2 cm fruits                      | 0                            |
| S0588 | Heinz    | Heinz 3 cm fruits                      | 0                            |
| S0589 | Heinz    | Heinz mature green fruits              | 0                            |
| S0590 | Heinz    | Heinz breaker fruits                   | 0                            |
| S0591 | Heinz    | Heinz breaker+10 fruits                | 0                            |
| S0592 | Heinz    | Heinz roots                            | 0                            |
| S0593 | Heinz    | Heinz leaves                           | 0.24                         |
| S0594 |          | pimpinellifolium immature green fruits | 0                            |
| S0595 |          | pimpinellifolium breaker fruits        | 0                            |
| S0596 |          | pimpinellifolium breaker+5 fruits      | 0                            |
| S0597 |          | pimpinellifolium leaves                | 0.44                         |

**Solyc10g086270 expression profile**

| ID    | genotype | sample                                 | normalized expression (RPKM) |
|-------|----------|----------------------------------------|------------------------------|
| S0584 | Heinz    | Heinz unopened flower buds             | 0.45                         |
| S0585 | Heinz    | Heinz fully opened flowers             | 0.13                         |
| S0586 | Heinz    | Heinz 1 cm fruits                      | 0                            |
| S0587 | Heinz    | Heinz 2 cm fruits                      | 0                            |
| S0588 | Heinz    | Heinz 3 cm fruits                      | 0                            |
| S0589 | Heinz    | Heinz mature green fruits              | 0                            |
| S0590 | Heinz    | Heinz breaker fruits                   | 0                            |
| S0591 | Heinz    | Heinz breaker+10 fruits                | 0                            |
| S0592 | Heinz    | Heinz roots                            | 0                            |
| S0593 | Heinz    | Heinz leaves                           | 6.06                         |
| S0594 |          | pimpinellifolium immature green fruits | 0                            |
| S0595 |          | pimpinellifolium breaker fruits        | 0                            |
| S0596 |          | pimpinellifolium breaker+5 fruits      | 0                            |
| S0597 |          | pimpinellifolium leaves                | 5.75                         |

**Solyc10g086290 expression profile**

| ID    | genotype | sample                                 | normalized expression (RPKM) |
|-------|----------|----------------------------------------|------------------------------|
| S0584 | Heinz    | Heinz unopened flower buds             | 0                            |
| S0585 | Heinz    | Heinz fully opened flowers             | 0                            |
| S0586 | Heinz    | Heinz 1 cm fruits                      | 1.2                          |
| S0587 | Heinz    | Heinz 2 cm fruits                      | 1.13                         |
| S0588 | Heinz    | Heinz 3 cm fruits                      | 0                            |
| S0589 | Heinz    | Heinz mature green fruits              | 0.15                         |
| S0590 | Heinz    | Heinz breaker fruits                   | 0                            |
| S0591 | Heinz    | Heinz breaker+10 fruits                | 0                            |
| S0592 | Heinz    | Heinz roots                            | 0                            |
| S0593 | Heinz    | Heinz leaves                           | 0                            |
| S0594 |          | pimpinellifolium immature green fruits | 2.94                         |
| S0595 |          | pimpinellifolium breaker fruits        | 0.68                         |
| S0596 |          | pimpinellifolium breaker+5 fruits      | 0                            |
| S0597 |          | pimpinellifolium leaves                | 0                            |



**Supplemental Figure 9. Expression of R2R3 MYB genes in *S. lycopersicum* var. Heinz and in the wild relative *S. pimpinellifolium*.**

Data are from a transcriptome analysis of various tissues in tomato cultivar Heinz and *S. pimpinellifolium* (Tomato Functional Genomics Database, <http://ted.bti.cornell.edu/cgi-bin/TFGD/digital/experiment.cgi?ID=D004>; Tomato Genome Consortium, 2012). Data of *Solyc10g086250* (*SIAN2*), *Solyc10g086260* (*SIANT1*), *Solyc10g086270* (*SIANT1like*) and *Solyc10g086290* (*SIAN2like*) are shown.
